# Supplementary material
Source: PubMed Central journal article supplement (PMC3454871)
Supplement: 4aaeae41d9c8ee0d596b45ea848b7c91_genetics.112.142802-11.pdf [file 4aaeae41d9c8ee0d596b45ea848b7c91_genetics.112.142802-11.pdf]

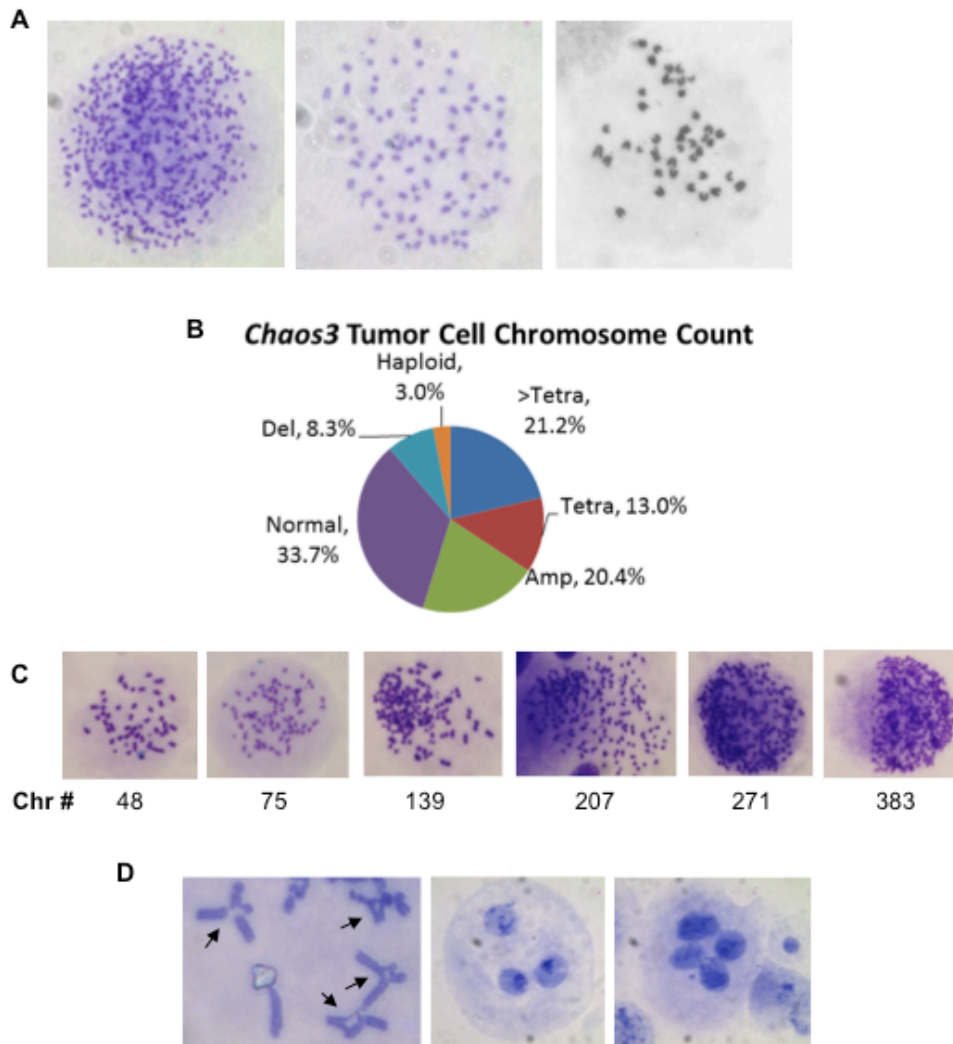

**Figure S1** *Chaos3* tumors demonstrate high levels of GIN and aneuploidy. (A) Metaphase spreads from cells of 3 *Chaos3* mammary tumors. Note aneuploidy in left and middle spreads compared to the normal 40 chromosomes (left to right: 414, 83, 40). (B) Examination of 16 *Chaos3* tumors reveal a normal chromosome count in an average of only 1/3 of the cells (>Tetra= Beyond Tetraploidy; Tetra=Tetraploid; Amp=Amplification; Del=Deletion). (C) Metaphase spreads from one *Chaos3* mammary tumor (16864a). Chromosome count is indicated beneath the images. Note the extreme variation of aneuploidy found within a single tumor. (D) Additional abnormal features displayed by tumor cells, including: cruciform structures (left) and abnormal multi-nucleated cells (middle and right).

**Mouse CNA Chr 11 78-79.6 Mb**

**Human Chr 17 22.6-26.9 Mb**

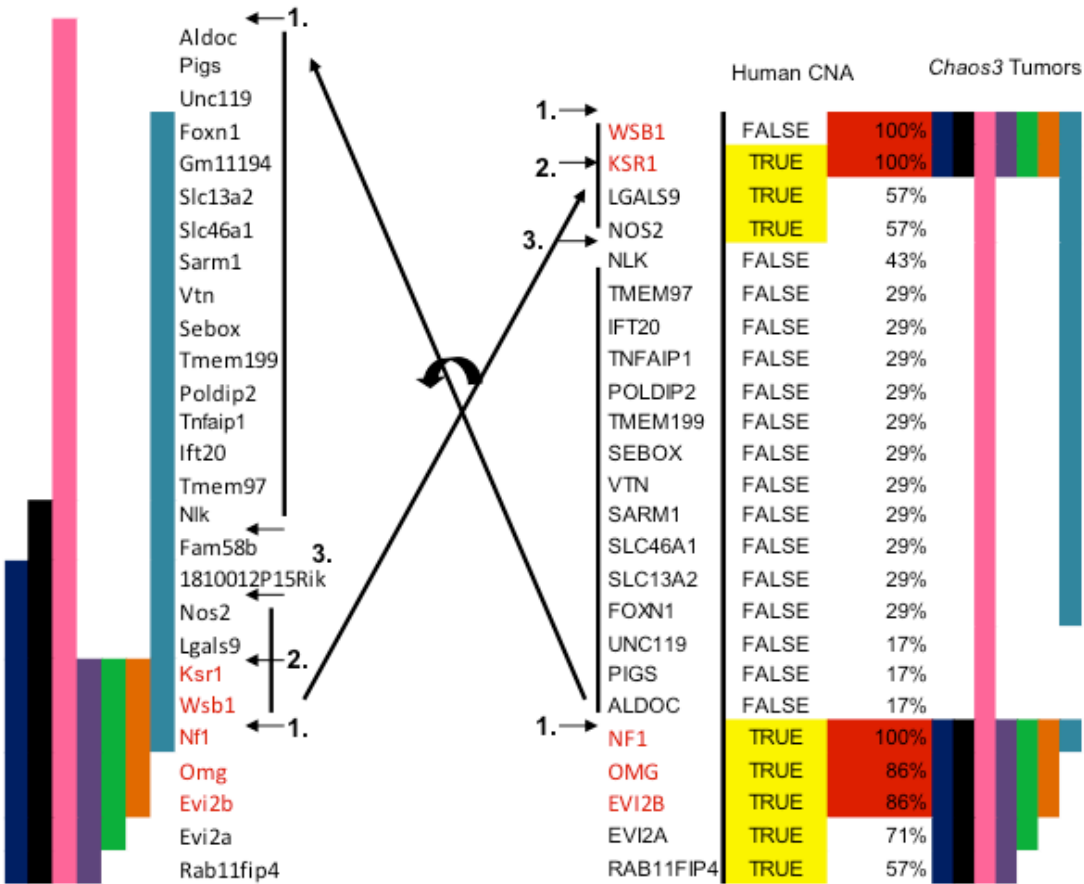

**Figure S2** Genomic sequence around *Nf1* is prone to CNA and contains a genomic rearrangement. Colored vertical bars represent the deleted region in 7 *Chaos3* mammary tumors as detected by aCGH, and the percentages reflect how many of these tumors contain CNA for a given mouse gene. Gene names in red denote the *Chaos3* critical region. Mouse and human genomic orientations of the *Nf1* region are depicted. TRUE/FALSE indicates TCGA Level 4 (limited dataset) analysis of a subset of invasive breast carcinomas for segmental CNAs; it is possible that the intervals between *NOS2* and *NF1* are actually part of more inclusive deletion events. Numbers in bold with small arrows indicate positions of interest: **1.** Proximal to *Nf1*, a breakpoint of chromosomal inversion between human and mouse occurred between and including *Wsb1* to *Aldoc*. This is a site of both human and mouse tumor CNA, and the human CNA begins with *NF1*. **2.** The mouse critical CNA begins at *Ksr1*, which has flipped orientation in humans and starts/forms a second smaller CNA, with the caveats mentioned above. **3.** The mouse genome has an insertion between *Nlk* and *Nos2*, where human statistically-declared CNAs end.

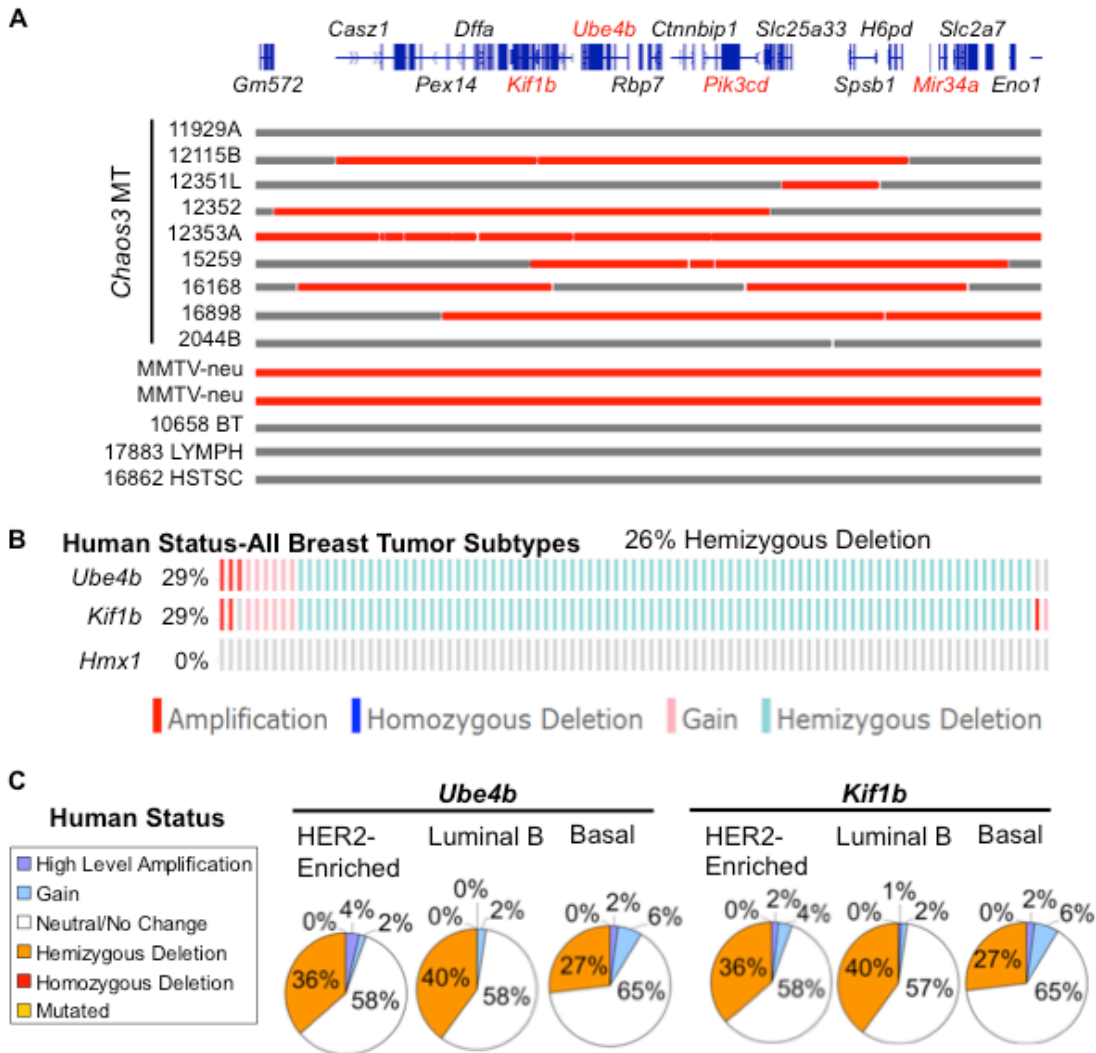

**Figure S3** *Ube4b* and *Kif1b*, deleted in over half of *Chaos3* mammary tumors, show frequent deletion in human breast tumors. (A) Recurrent Chr 4 deletions specific to mammary tumors (MT). Horizontal bars represent tumors examined by aCGH. Red portions of bars indicate deleted regions in *Chaos3* and MMTV-neu MTs. Cancer-related genes are in red. Note that *Chaos3* non-MTs do not demonstrate this deletion. BT=bone tumor; LYMPH = Lymphoma; HSTSC=histiocytic sarcoma. (B) “Oncoprints” of *Ube4b* and *Kif1b* alterations in 320 human breast tumors (TCGA data) generated by the cBio portal (see Methods). Rows contain bars representing individual tumors, and samples are aligned for visualization of alterations within the same tumor across multiple genes. *Hmx1* does not have a known role in cancer. (C) Percentage of *Ube4b* and *Kif1b* CNAs in 55 Her2-Enriched, 125 Luminal B, and 93 Basal human breast tumors (TCGA). Note that ~40% of HER2-Enriched and Luminal B tumors have hemizygous deletion of *Ube4b* and *Kif1b*, as do 27% of Basal-type breast tumors.

Files S1-S4  
Supporting Data

Available for download at <http://www.genetics.org/lookup/suppl/doi:10.1534/genetics.112.142802/-/DC1>.

**Table S1 Validated Gene Mutations in *Chaos3* Mammary Tumors**

| Sample | Name  | Mutation | Effect      | Description                         | Function                                                                                                      |
|--------|-------|----------|-------------|-------------------------------------|---------------------------------------------------------------------------------------------------------------|
| 15259  | Myo1g | G/A      | Splice Site | Myosin-Ig                           | Precursor of minor histocompatibility antigen HA-2                                                            |
| 2042   | Acsf6 | G/T      | E>D         | Long-chain-fatty-acid--CoA ligase 6 | Catalyze formation of acyl-CoA from fatty acids, ATP, and CoA.                                                |
| 2042   | Tdrd6 | T/C      | H>R         | Tudor domain-containing protein 6   | Required for spermiogenesis, chromatoid body architecture, and regulation of miRNA expression.                |
| 2042   | Ttn   | C/T      | D>N         | Titin (Connectin)                   | Cardiac and skeletal muscle protein. Disease Associations: Familial Cardiomyopathy, Tibial muscular dystrophy |
| 2044b  | Ttn   | C/G      | V>L         | Titin (Connectin)                   |                                                                                                               |

Note: The mutations were validated by Sanger sequencing of PCR products.

Table S2 *Chaos3*-specific and Mammary Tumor-specific Recurrent Deletions Overlapping Human Breast Cancer CNAs.

| Mouse CNA                   | Gene     | Hum Chr | Human CNA | <i>Chaos3</i> CNA | Tumors |   |   |   |   |   |   |   |   |   |
|-----------------------------|----------|---------|-----------|-------------------|--------|---|---|---|---|---|---|---|---|---|
|                             |          |         |           |                   | A      | B | C | D | E | F | G | H | I |   |
| Mmu Chr 4<br>148.4-149.5 Mb | SLC2A7   | 1       | FALSE     | 33%               |        | x |   |   |   | x |   |   |   |   |
|                             | SLC2A5   | 1       | FALSE     | 50%               |        | x |   |   |   | x | x |   |   |   |
|                             | GPR157   | 1       | FALSE     | 50%               |        | x |   |   |   | x | x |   |   |   |
|                             | MIR34A   | 1       | FALSE     | 50%               |        | x |   |   |   | x | x |   |   |   |
|                             | H6PD     | 1       | FALSE     | 57%               |        | x |   |   |   | x | x | x |   |   |
|                             | SPSB1    | 1       | FALSE     | 86%               |        | x | x |   |   | x | x | x | x |   |
|                             | SLC25A33 | 1       | FALSE     | 86%               |        | x | x |   |   | x | x | x | x |   |
|                             | TMEM201  | 1       | FALSE     | 86%               |        | x | x |   |   | x | x | x | x |   |
|                             | PIK3CD   | 1       | FALSE     | 86%               |        | x |   |   | x | x | x | x | x |   |
|                             | CLSTN1   | 1       | FALSE     | 71%               |        | x |   |   | x | x |   | x | x |   |
|                             | CTNNBIP1 | 1       | FALSE     | 71%               |        | x |   |   | x | x |   | x | x |   |
|                             | LZIC     | 1       | FALSE     | 71%               |        | x |   |   | x | x |   | x | x |   |
|                             | NMNAT1   | 1       | FALSE     | 71%               |        | x |   |   | x | x |   | x | x |   |
|                             | RBP7     | 1       | FALSE     | 71%               |        | x |   |   | x | x |   | x | x |   |
|                             | UBE4B    | 1       | TRUE      | 71%               |        | x |   |   | x | x |   | x | x |   |
|                             | KIF1B    | 1       | TRUE      | 71%               |        | x |   |   | x | x |   | x | x |   |
|                             | PGD      | 1       | TRUE      | 33%               |        |   | x |   | x |   |   |   |   | x |
|                             | APITD1   | 1       | TRUE      | 33%               |        |   | x |   | x |   |   |   |   | x |
|                             | CORT     | 1       | TRUE      | 33%               |        |   | x |   | x |   |   |   |   | x |
|                             | DFFA     | 1       | TRUE      | 33%               |        |   | x |   | x |   |   |   |   | x |
|                             | PEX14    | 1       | TRUE      | 33%               |        |   | x |   | x |   |   |   |   | x |
|                             | CASZ1    | 1       | TRUE      | 33%               |        |   | x |   | x |   |   |   |   |   |
|                             | TARDBP   | 1       | FALSE     | 17%               |        |   | x |   |   |   |   |   |   |   |
| MASP2                       | 1        | FALSE   | 17%       |                   |        | x |   |   |   |   |   |   |   |   |
| SRM                         | 1        | FALSE   | 17%       |                   |        | x |   |   |   |   |   |   |   |   |
| Mmu Chr 5<br>122-125 Mb     | CLIP1    | 12      | FALSE     | 43%               | x      | x |   |   |   |   |   |   | x |   |
|                             | ZCCHC8   | 12      | FALSE     | 43%               | x      | x |   |   |   |   |   |   | x |   |
|                             | RSRC2    | 12      | FALSE     | 43%               | x      | x |   |   |   |   |   |   | x |   |
|                             | KNTC1    | 12      | FALSE     | 71%               | x      | x |   | x |   |   |   | x |   | x |
|                             | GPR81    | 12      | FALSE     | 71%               | x      | x |   | x |   |   |   | x |   | x |
|                             | DENR     | 12      | FALSE     | 71%               | x      | x |   | x |   |   |   | x |   | x |
|                             | CCDC62   | 12      | FALSE     | 71%               | x      | x |   | x |   |   |   | x |   | x |
|                             | HIP1R    | 12      | FALSE     | 71%               | x      | x |   | x |   |   |   | x |   | x |
|                             | VPS37B   | 12      | FALSE     | 86%               | x      | x | x | x |   |   |   | x |   | x |
|                             | ABCB9    | 12      | FALSE     | 86%               | x      | x | x | x |   |   |   | x |   | x |
|                             | OGFOD2   | 12      | FALSE     | 86%               | x      | x | x | x |   |   |   | x |   | x |
|                             | ARL6IP4  | 12      | FALSE     | 86%               | x      | x | x | x |   |   |   | x |   | x |
|                             | PITPNM2  | 12      | FALSE     | 86%               | x      | x | x | x |   |   |   | x |   | x |
|                             | MPHOSPH9 | 12      | FALSE     | 86%               | x      | x | x | x |   |   |   | x |   | x |
|                             | CDK2AP1  | 12      | FALSE     | 86%               | x      | x | x | x |   |   |   | x |   | x |
| SBNO1                       | 12       | FALSE   | 86%       | x                 | x      | x | x |   |   |   | x |   | x |   |

|                                 |           |     |       |      |      |   |   |    |    |    |    |   |    |
|---------------------------------|-----------|-----|-------|------|------|---|---|----|----|----|----|---|----|
|                                 | SETD8     | 12  | FALSE | 86%  | x    | x | x | x  |    | x  | x  |   |    |
|                                 | RILPL2    | 12  | FALSE | 86%  | x    | x | x | x  |    | x  | x  |   |    |
|                                 | SNRNP35   | 12  | FALSE | 100% | x    | x | x | x  |    | x  | x  |   |    |
|                                 | RILPL1    | 12  | FALSE | 100% | x    | x | x | x  |    | x  | x  |   |    |
|                                 | TMED2     | 12  | FALSE | 100% | x    | x | x | x  |    | x  | x  |   |    |
|                                 | DDX55     | 12  | FALSE | 100% | x    | x | x | x  |    | x  | x  |   |    |
|                                 | EIF2B1    | 12  | FALSE | 100% | x    | x | x | x  |    | x  | x  |   |    |
|                                 | GTF2H3    | 12  | FALSE | 100% | x    | x | x | x  |    | x  | x  |   |    |
|                                 | TCTN2     | 12  | FALSE | 100% | x    | x | x | x  |    | x  | x  |   |    |
|                                 | ATP6V0A2  | 12  | FALSE | 43%  |      |   |   |    | x  |    | x  |   |    |
|                                 | CCDC92    | 12  | FALSE | 29%  |      |   |   |    |    | x  | x  |   |    |
|                                 | Zfp664    | 12  | FALSE | 14%  |      |   |   |    |    | x  |    |   |    |
|                                 | Fam101a   | 12  | TRUE  | 14%  |      |   |   |    |    | x  |    |   |    |
|                                 | Ncor2     | 12  | TRUE  | 14%  |      |   |   |    |    | x  |    |   |    |
|                                 | Scarb1    | 12  | FALSE | 14%  |      |   |   |    |    | x  |    |   |    |
| <b>Mmu Chr 11</b><br>78-79.6 Mb | WSB1      | 17  | FALSE | 100% | x    | x | x | *  | x  | *  | x  | x | x* |
|                                 | KSR1      | 17  | TRUE  | 100% | x    | x | x | *  | x  | *  | x  | x | x* |
|                                 | LGALS9    | 17  | TRUE  | 57%  |      | x |   | x* |    | x* |    | x | x* |
|                                 | NOS2      | 17  | TRUE  | 57%  |      | x |   | x* |    | *  |    | x |    |
|                                 | NLK       | 17  | FALSE | 43%  |      | x |   |    |    | x* |    | x |    |
|                                 | TMEM97    | 17  | FALSE | 29%  |      | x |   |    |    | *  |    | x |    |
|                                 | IFT20     | 17  | FALSE | 29%  |      | x |   |    |    | *  |    | x |    |
|                                 | TNFAIP1   | 17  | FALSE | 29%  |      | x |   |    |    | x* |    | x |    |
|                                 | POLDIP2   | 17  | FALSE | 29%  |      | x |   |    |    |    |    | x |    |
|                                 | TMEM199   | 17  | FALSE | 29%  |      | x |   |    |    |    |    | x |    |
|                                 | SEBOX     | 17  | FALSE | 29%  |      | x |   |    |    |    |    | x |    |
|                                 | VTN       | 17  | FALSE | 29%  |      | x |   |    |    |    |    | x |    |
|                                 | SARM1     | 17  | FALSE | 29%  |      | x |   |    |    |    |    | x |    |
|                                 | SLC46A1   | 17  | FALSE | 29%  |      | x |   |    |    |    |    | x |    |
|                                 | SLC13A2   | 17  | FALSE | 29%  |      | x |   |    |    |    |    | x |    |
|                                 | FOXN1     | 17  | FALSE | 29%  |      | x |   |    |    |    |    | x |    |
|                                 | UNC119    | 17  | FALSE | 17%  |      | x |   |    |    |    |    |   |    |
|                                 | PIGS      | 17  | FALSE | 17%  |      | x |   |    |    |    |    |   |    |
|                                 | ALDOC     | 17  | FALSE | 17%  |      | x |   |    |    |    |    |   |    |
|                                 |           | NF1 | 17    | TRUE | 100% | x | x | x  | x* | x  | x* | x | x  |
|                                 | OMG       | 17  | TRUE  | 86%  | x    | x | x | x* | x  |    | x  |   | x  |
|                                 | EVI2B     | 17  | TRUE  | 86%  | x    | x | x | *  | x  |    | x  |   | x  |
|                                 | EVI2A     | 17  | TRUE  | 71%  | x    | x | x | *  | x  |    | x  |   |    |
|                                 | RAB11FIP4 | 17  | TRUE  | 57%  | x    | x | x | x* | x  |    |    |   |    |

**Legend.** x= deleted as determined by aCGH analysis. Some qPCR genotyping from the Chr 11 interval was added, and deleted probes are indicated as x\*. Presumed deleted probes are indicated by "\*". Tumor Codes: A: 2044B; B: 12353A; C: 12351L; D: 12352; E: 15259; F: 16168; G: 12115B; H: 16898; I: 11929A. Mmu = *Mus musculus*. Some of the deletions extend further than indicated. The True (deleted) and False (not deleted) calls for human gene deletions are from TCGA level 4 data (see Methods) and refer to whether that locus is deleted at levels statistically above background. Human genes in red are potentially cancer-relevant if deleted. Red shaded regions are the "critical regions" of a deletion set. Note that the Mmu Chr 11 deletion cluster is organized in the human genome order, which is inverted and has an insertion. Thus, the critical region is actually contiguous. The "Chaos3 CNA" column refers to the % of Chaos3 mammary tumors analyzed by aCGH that contained deletions of that particular locus. ND=no data.

**Table S3** *Chaos3* Mammary Tumor Non-specific Recurrent Deletions Overlapping Human Breast Cancer CNAs.

| Mouse Region                | Human Gene | Hs    |           | <i>Chaos3</i> |   |   |   |   |   |   |   |   |
|-----------------------------|------------|-------|-----------|---------------|---|---|---|---|---|---|---|---|
|                             |            | Chr   | Human CNA | CNA           | A | B | C | D | E | F | G |   |
| Mmu Chr 4<br>132.4-133.5 Mb | AIM1L      | 1     | FALSE     | 43%           |   | x | x |   |   |   | x |   |
|                             | LIN28      | 1     | FALSE     | 71%           |   | x | x | x |   |   | x | x |
|                             | DHDDS      | 1     | FALSE     | 71%           |   | x | x | x |   |   | x | x |
|                             | HMG2       | 1     | FALSE     | 71%           |   | x | x | x |   |   | x | x |
|                             | RPS6KA1    | 1     | FALSE     | 86%           |   | x | x | x | x | x | x | x |
|                             | ARID1A     | 1     | FALSE     | 100%          |   | x | x | x | x | x | x | x |
|                             | PIGV       | 1     | FALSE     | 100%          |   | x | x | x | x | x | x | x |
|                             | ZDHHC18    | 1     | TRUE      | 86%           |   | x | x | x |   | x | x | x |
|                             | SFN        | 1     | TRUE      | 86%           |   | x | x | x |   | x | x | x |
|                             | GPN2       | 1     | TRUE      | 86%           |   | x | x | x |   | x | x | x |
|                             | GPATCH3    | 1     | TRUE      | 86%           |   | x | x | x |   | x | x | x |
|                             | NR0B2      | 1     | TRUE      | 86%           |   | x | x | x |   | x | x | x |
|                             | NUDC       | 1     | TRUE      | 86%           |   | x | x | x |   | x | x | x |
|                             | TRNP1      | 1     | TRUE      | 86%           |   | x | x | x |   | x | x | x |
|                             | FAM46B     | 1     | FALSE     | 86%           |   | x | x | x |   | x | x | x |
|                             | SLC9A1     | 1     | FALSE     | 71%           |   | x |   | x |   | x | x | x |
|                             | WDTC1      | 1     | FALSE     | 43%           |   | x |   |   |   | x |   | x |
|                             | TMEM222    | 1     | FALSE     | 43%           |   | x |   |   |   | x |   | x |
|                             | SYTL1      | 1     | FALSE     | 43%           |   | x |   |   |   | x |   | x |
|                             | MAP3K6     | 1     | FALSE     | 43%           |   | x |   |   |   | x |   | x |
|                             | CD164L2    | 1     | FALSE     | 43%           |   | x |   |   |   | x |   | x |
| GPR3                        | 1          | FALSE | 43%       |               | x |   |   |   | x |   | x |   |
| Mmu Chr 10<br>79.4-80.2 Mb  | PPAP2C     | 19    | TRUE      | 33%           |   |   |   |   | x | x |   |   |
|                             | MIER2      | 19    | TRUE      | 33%           |   |   |   |   | x | x |   |   |
|                             | THEG       | 19    | TRUE      | 33%           |   |   |   |   | x | x |   |   |
|                             | C2CD4C     | 19    | TRUE      | 33%           |   |   |   |   | x | x |   |   |
|                             | SHC2       | 19    | TRUE      | 33%           |   |   |   |   | x | x |   |   |
|                             | ODF3L2     | 19    | TRUE      | 33%           |   |   |   |   | x | x |   |   |
|                             | MADCAM1    | 19    | TRUE      | 33%           |   |   |   |   | x | x |   |   |
|                             | CDC34      | 19    | TRUE      | 33%           |   |   |   |   | x | x |   |   |
|                             | GZMM       | 19    | TRUE      | 33%           |   |   |   |   | x | x |   |   |
|                             | BSG        | 19    | TRUE      | 33%           |   |   |   |   | x | x |   |   |
|                             | HCN2       | 19    | TRUE      | 33%           |   |   |   |   | x | x |   |   |
|                             | POLRMT     | 19    | TRUE      | 33%           |   |   |   |   | x | x |   |   |
|                             | FGF22      | 19    | TRUE      | 33%           |   |   |   |   | x | x |   |   |
|                             | RNF126     | 19    | TRUE      | 33%           |   |   |   |   | x | x |   |   |
|                             | FSTL3      | 19    | TRUE      | 33%           |   |   |   |   | x | x |   |   |
|                             | PRSSL1     | 19    | TRUE      | 33%           |   |   |   |   | x | x |   |   |
|                             | PALM       | 19    | TRUE      | 33%           |   |   |   |   | x | x |   |   |
|                             | PTBP1      | 19    | TRUE      | 33%           |   |   |   |   | x | x |   |   |
|                             | PRTN3      | 19    | TRUE      | 33%           |   |   |   |   | x | x |   |   |
|                             | ELANE      | 19    | TRUE      | 33%           |   |   |   |   | x | x |   |   |



|          |    |      |     |   |   |   |   |
|----------|----|------|-----|---|---|---|---|
| CFD      | 19 | TRUE | 33% |   | x | x |   |
| MED16    | 19 | TRUE | 33% |   | x | x |   |
| KISS1R   | 19 | TRUE | 50% |   | x | x | x |
| ARID3A   | 19 | TRUE | 50% |   | x | x | x |
| WDR18    | 19 | TRUE | 50% |   | x | x | x |
| GRIN3B   | 19 | TRUE | 50% |   | x | x | x |
| CNN2     | 19 | TRUE | 50% |   | x | x | x |
| ABCA7    | 19 | TRUE | 50% |   | x | x | x |
| HMHA1    | 19 | TRUE | 50% |   | x | x | x |
| POLR2E   | 19 | TRUE | 50% |   | x | x | x |
| GPX4     | 19 | TRUE | 50% |   | x | x | x |
| SBNO2    | 19 | TRUE | 50% |   | x | x | x |
| STK11    | 19 | TRUE | 50% |   | x | x | x |
| ATP5D    | 19 | TRUE | 50% |   | x | x | x |
| MIDN     | 19 | TRUE | 50% |   | x | x | x |
| CIRBP    | 19 | TRUE | 33% |   | x | x |   |
| EFNA2    | 19 | TRUE | 33% |   | x | x |   |
| MUM1     | 19 | TRUE | 33% |   | x | x |   |
| NDUFS7   | 19 | TRUE | 33% |   | x | x |   |
| GAMT     | 19 | TRUE | 33% |   | x | x |   |
| DAZAP1   | 19 | TRUE | 33% |   | x | x |   |
| RPS15    | 19 | TRUE | 33% |   | x | x |   |
| APC2     | 19 | TRUE | 33% |   | x | x |   |
| PCSK4    | 19 | TRUE | 33% |   | x | x |   |
| REEP6    | 19 | TRUE | 33% |   | x | x |   |
| ADAMTSL5 | 19 | TRUE | 33% |   | x | x |   |
| MEX3D    | 19 | TRUE | 50% |   | x | x | x |
| MBD3     | 19 | TRUE | 50% |   | x | x | x |
| TCF3     | 19 | TRUE | 50% |   | x | x | x |
| ONECUT3  | 19 | TRUE | 67% | x | x | x | x |
| ATP8B3   | 19 | TRUE | 67% | x | x | x | x |
| REXO1    | 19 | TRUE | 67% | x | x | x | x |
| KLF16    | 19 | TRUE | 67% | x | x | x | x |
| SCAMP4   | 19 | TRUE | 67% | x | x | x | x |
| ADAT3    | 19 | TRUE | 67% | x | x | x | x |
| CSNK1G2  | 19 | TRUE | 67% | x | x | x | x |
| BTBD2    | 19 | TRUE | 67% | x | x | x | x |
| MKNK2    | 19 | TRUE | 67% | x | x | x | x |
| MOBKL2A  | 19 | TRUE | 67% | x | x | x | x |
| AP3D1    | 19 | TRUE | 67% | x | x | x | x |
| DOT1L    | 19 | TRUE | 67% | x | x | x | x |
| PLEKHJ1  | 19 | TRUE | 67% | x | x | x | x |
| SF3A2    | 19 | TRUE | 67% | x | x | x | x |
| AMH      | 19 | TRUE | 67% | x | x | x | x |
| JSRP1    | 19 | TRUE | 67% | x | x | x | x |
| OAZ1     | 19 | TRUE | 67% | x | x | x | x |

|         |    |       |     |   |   |   |   |
|---------|----|-------|-----|---|---|---|---|
| LINGO3  | 19 | TRUE  | 67% | x | x | x | x |
| LSM7    | 19 | TRUE  | 33% |   | x | x |   |
| TMPRSS9 | 19 | FALSE | 33% |   | x | x |   |
| TIMM13  | 19 | FALSE | 33% |   | x | x |   |
| LMNB2   | 19 | FALSE | 33% |   | x | x |   |
| GADD45B | 19 | FALSE | 17% |   | x |   |   |

**Legend.** x= deleted. Tumor Codes: A: 15259; B: 12353A; C: 12115B; D: 11929A; E: 16898; F: 2044B; G: 16892. Mmu = *Mus musculus*. Hs = *Homo sapiens*. Some of the deletions extend further than indicated. The True (deleted) and False (not deleted) calls for human gene deletions are from TCGA level 4 data (see Methods) and refer to whether that locus is deleted at levels statistically above background. Human genes in red are potentially cancer-relevant. Red shaded regions are the “critical regions” of a deletion set. The “Chaos3 CNA” column refers to the % of Chaos3 mammary tumors analyzed by aCGH that contained deletions of that particular locus.

Table S4 qPCR analysis of *Nf1* locus in tumors

| Geno & Type | Tumor #  | <i>Nf1</i> 5' | <i>Nf1</i> 3' ( <i>Omg</i> ) |
|-------------|----------|---------------|------------------------------|
| Chaos3 MT   | 15259    | 17.4          | 52.9                         |
| Chaos3 MT   | 12351 L  | 35.5          | 12.0                         |
| Chaos3 MT   | 12353A   | 25.5          | 16.7                         |
| Chaos3 MT   | 12352    | 12.7          | 0.7                          |
| Chaos3 MT   | 2044B CL | 63.7          | 48.0                         |
| Chaos3 MT   | 11929A   | 16.7          | 16.3                         |
| Chaos3 MT   | 16168    | 9.2           | ND                           |
| Chaos3 MT   | 16898    | 9.6           | 75.1                         |
| Chaos3 MT   | 12115B   | 31.2          | 38.7                         |
| Chaos3 MT   | 2042 CL  | 78.9          | 92.3                         |
| Chaos3 MT   | 919 CL   | 51.8          | 0.1                          |
| Chaos3 MT   | 21040    | 0.1           | 0.1                          |
| Chaos3 MT   | 21253    | 0.3           | 0.2                          |
| Chaos3 MT   | 20317    | 29.5          | 48.7                         |
| Chaos3 MT   | 19957    | 32.7          | 5.4                          |
| Chaos3 MT   | 19958    | 11.2          | 12.4                         |
| Chaos3 MT   | 19959    | 14.4          | 72.4                         |
| Chaos3 MT   | 20783    | 7.0           | 10.4                         |
| Chaos3 MT   | 20164    | 20.6          | 22.8                         |
| Chaos3 MT   | 20888    | 27.3          | 26.0                         |
| Chaos3 MT   | 20892    | 6.4           | 34.9                         |
| Chaos3 MT   | 20893    | 7.4           | 24.5                         |
| Chaos3 MT   | 20138    | 41.1          | 10.8                         |
| Chaos3 MT   | 21039    | 68.4          | 66.7                         |
| Chaos3 MT   | 21809    | 62.0          | 60.0                         |
| Chaos3 MT   | 20894    | 85.1          | 67.1                         |
| Chaos3 MT   | 20889    | 12.0          | 18.4                         |
| Chaos3 MT   | 21333    | 40.8          | 71.4                         |
| Chaos3 MT   | 20626    | 36.7          | 22.6                         |
| Chaos3 MT   | 20318    | 14.5          | 24.9                         |
| Chaos3 MT   | 20890    | 13.6          | 38.9                         |
| Chaos3 MT   | 20891    | 2.5           | 1.4                          |
| Chaos3 MT   | 21123    | 34.7          | 39.0                         |
| Chaos3 MT   | 19660    | 44.8          | 48.3                         |
| Chaos3 MT   | 20459    | 53.7          | 69.8                         |
| Chaos3 MT   | 21597    | 28.6          | 5.3                          |
| Chaos3 MT   | 22182    | 62.6          | 78.2                         |
| Chaos3 MT   | 21416    | 63.8          | 56.8                         |
| Chaos3 MT   | 22236    | 31.6          | 8.0                          |
| Chaos3 MT   | 22418    | 24.9          | 24.2                         |
| Chaos3 MT   | 22180    | 23.9          | 49.0                         |
| Chaos3 MT   | 22235    | 8.1           | 8.2                          |
| Chaos3 MT   | 22166    | 21.7          | 21.0                         |
| Chaos3 MT   | 22168    | 8.0           | 7.6                          |
| Chaos3 MT   | 22238    | 3.4           | 3.4                          |

|               |       |       |       |
|---------------|-------|-------|-------|
| Chaos3 MT     | 21417 | 3.3   | 14.8  |
| Chaos3 MT     | 21419 | 19.2  | 50.6  |
| Chaos3 MT     | 21255 | 7.0   | 6.1   |
| Chaos3 MT     | 21124 | 8.5   | 29.1  |
| Chaos3 MT     | 21810 | 26.3  | 27.0  |
| Chaos3 MT     | 21811 | 47.3  | 51.7  |
| Chaos3 MT     | 21254 | 9.5   | 7.9   |
| Chaos3 MT     | 21041 | 24.4  | 21.2  |
| Chaos3 MT     | 22420 | 40.5  | 17.1  |
| Chaos3 MT     | 22476 | 75.5  | 70.7  |
| Chaos3 MT     | 22414 | 3.3   | 17.1  |
| Chaos3 MT     | 22416 | 3.5   | 14.6  |
| Chaos3 MT     | 22417 | 7.1   | 19.4  |
| Chaos3 MT     | 23116 | 11.2  | 10.8  |
| Chaos3 MT     | 22418 | 115.0 | 110.3 |
| Chaos3 non-MT | 19160 | 198.2 | 207.5 |
| Chaos3 non-MT | 10658 | 87.1  | ND    |
| Chaos3 non-MT | 16862 | 98.5  | 101.2 |
| Chaos3 non-MT | 17883 | 97.0  | 88.0  |
| PyVT          |       | 96.3  | 105.1 |
| MMTV-neu1     |       | 108.6 | 93.2  |
| MMTV-neu2     |       | 103.8 | 104.4 |
| Chaos3 +/- MT |       | 107.3 | 109.4 |

**Legend.** qPCR values are presented as the percentage vs C3H DNA. *Nf1* probes were at the 5' and 3' ends of the gene. The 3' probe actually corresponds to the *Omg* gene that lies within an *Nf1* intron near the 3' end. Note that copy number differences between the *Nf1* 5' and 3' are observed in some tumors, indicating a breakpoint within *Nf1*. Deletion calls were made as follows: Heterozygous = 15-80%; Homozygous = <15%. If either *Nf1* or *Omg* were <15%, the tumor sample was called as homozygous deleted because full *Nf1* transcripts cannot be made. MT = mammary tumor.
