# Supplementary material
Source: PubMed Central journal article supplement (PMC3454871)
Supplement: 8ae29fb315ef2c5401ad0c3b71d63029_genetics.112.142802-3.pdf [file 8ae29fb315ef2c5401ad0c3b71d63029_genetics.112.142802-3.pdf]

**Table S3** *Chaos3* Mammary Tumor Non-specific Recurrent Deletions Overlapping Human Breast Cancer CNAs.

| Mouse Region                       | Human Gene | Hs  |           | <i>Chaos3</i> |   |   |   |   |   |   |   |   |
|------------------------------------|------------|-----|-----------|---------------|---|---|---|---|---|---|---|---|
|                                    |            | Chr | Human CNA | CNA           | A | B | C | D | E | F | G |   |
| <b>Mmu Chr 4</b><br>132.4-133.5 Mb | AIM1L      | 1   | FALSE     | 43%           |   | x | x |   |   |   | x |   |
|                                    | LIN28      | 1   | FALSE     | 71%           |   | x | x | x |   |   | x | x |
|                                    | DHDDS      | 1   | FALSE     | 71%           |   | x | x | x |   |   | x | x |
|                                    | HMG2       | 1   | FALSE     | 71%           |   | x | x | x |   |   | x | x |
|                                    | RPS6KA1    | 1   | FALSE     | 86%           |   | x | x | x | x | x | x | x |
|                                    | ARID1A     | 1   | FALSE     | 100%          | x | x | x | x | x | x | x | x |
|                                    | PIGV       | 1   | FALSE     | 100%          | x | x | x | x | x | x | x | x |
|                                    | ZDHHC18    | 1   | TRUE      | 86%           | x | x | x |   | x | x | x |   |
|                                    | SFN        | 1   | TRUE      | 86%           | x | x | x |   | x | x | x |   |
|                                    | GPN2       | 1   | TRUE      | 86%           | x | x | x |   | x | x | x |   |
|                                    | GPATCH3    | 1   | TRUE      | 86%           | x | x | x |   | x | x | x |   |
|                                    | NR0B2      | 1   | TRUE      | 86%           | x | x | x |   | x | x | x |   |
|                                    | NUDC       | 1   | TRUE      | 86%           | x | x | x |   | x | x | x |   |
|                                    | TRNP1      | 1   | TRUE      | 86%           | x | x | x |   | x | x | x |   |
|                                    | FAM46B     | 1   | FALSE     | 86%           | x | x | x |   | x | x | x |   |
|                                    | SLC9A1     | 1   | FALSE     | 71%           | x |   | x |   | x |   | x | x |
|                                    | WDC1       | 1   | FALSE     | 43%           | x |   |   |   | x |   |   | x |
|                                    | TMEM222    | 1   | FALSE     | 43%           | x |   |   |   | x |   |   | x |
|                                    | SYTL1      | 1   | FALSE     | 43%           | x |   |   |   | x |   |   | x |
|                                    | MAP3K6     | 1   | FALSE     | 43%           | x |   |   |   | x |   |   | x |
|                                    | CD164L2    | 1   | FALSE     | 43%           | x |   |   |   | x |   |   | x |
|                                    | GPR3       | 1   | FALSE     | 43%           | x |   |   |   | x |   |   | x |
| <b>Mmu Chr 10</b><br>79.4-80.2 Mb  | PPAP2C     | 19  | TRUE      | 33%           |   |   |   | x | x |   |   |   |
|                                    | MIER2      | 19  | TRUE      | 33%           |   |   |   | x | x |   |   |   |
|                                    | THEG       | 19  | TRUE      | 33%           |   |   |   | x | x |   |   |   |
|                                    | C2CD4C     | 19  | TRUE      | 33%           |   |   |   | x | x |   |   |   |
|                                    | SHC2       | 19  | TRUE      | 33%           |   |   |   | x | x |   |   |   |
|                                    | ODF3L2     | 19  | TRUE      | 33%           |   |   |   | x | x |   |   |   |
|                                    | MADCAM1    | 19  | TRUE      | 33%           |   |   |   | x | x |   |   |   |
|                                    | CDC34      | 19  | TRUE      | 33%           |   |   |   | x | x |   |   |   |
|                                    | GZMM       | 19  | TRUE      | 33%           |   |   |   | x | x |   |   |   |
|                                    | BSG        | 19  | TRUE      | 33%           |   |   |   | x | x |   |   |   |
|                                    | HCN2       | 19  | TRUE      | 33%           |   |   |   | x | x |   |   |   |
|                                    | POLRMT     | 19  | TRUE      | 33%           |   |   |   | x | x |   |   |   |
|                                    | FGF22      | 19  | TRUE      | 33%           |   |   |   | x | x |   |   |   |
|                                    | RNF126     | 19  | TRUE      | 33%           |   |   |   | x | x |   |   |   |
|                                    | FSTL3      | 19  | TRUE      | 33%           |   |   |   | x | x |   |   |   |
|                                    | PRSSL1     | 19  | TRUE      | 33%           |   |   |   | x | x |   |   |   |
|                                    | PALM       | 19  | TRUE      | 33%           |   |   |   | x | x |   |   |   |
|                                    | PTBP1      | 19  | TRUE      | 33%           |   |   |   | x | x |   |   |   |
|                                    | PRTN3      | 19  | TRUE      | 33%           |   |   |   | x | x |   |   |   |
|                                    | ELANE      | 19  | TRUE      | 33%           |   |   |   | x | x |   |   |   |

|          |    |      |     |   |   |   |   |
|----------|----|------|-----|---|---|---|---|
| CFD      | 19 | TRUE | 33% |   | x | x |   |
| MED16    | 19 | TRUE | 33% |   | x | x |   |
| KISS1R   | 19 | TRUE | 50% |   | x | x | x |
| ARID3A   | 19 | TRUE | 50% |   | x | x | x |
| WDR18    | 19 | TRUE | 50% |   | x | x | x |
| GRIN3B   | 19 | TRUE | 50% |   | x | x | x |
| CNN2     | 19 | TRUE | 50% |   | x | x | x |
| ABCA7    | 19 | TRUE | 50% |   | x | x | x |
| HMHA1    | 19 | TRUE | 50% |   | x | x | x |
| POLR2E   | 19 | TRUE | 50% |   | x | x | x |
| GPX4     | 19 | TRUE | 50% |   | x | x | x |
| SBNO2    | 19 | TRUE | 50% |   | x | x | x |
| STK11    | 19 | TRUE | 50% |   | x | x | x |
| ATP5D    | 19 | TRUE | 50% |   | x | x | x |
| MIDN     | 19 | TRUE | 50% |   | x | x | x |
| CIRBP    | 19 | TRUE | 33% |   | x | x |   |
| EFNA2    | 19 | TRUE | 33% |   | x | x |   |
| MUM1     | 19 | TRUE | 33% |   | x | x |   |
| NDUFS7   | 19 | TRUE | 33% |   | x | x |   |
| GAMT     | 19 | TRUE | 33% |   | x | x |   |
| DAZAP1   | 19 | TRUE | 33% |   | x | x |   |
| RPS15    | 19 | TRUE | 33% |   | x | x |   |
| APC2     | 19 | TRUE | 33% |   | x | x |   |
| PCSK4    | 19 | TRUE | 33% |   | x | x |   |
| REEP6    | 19 | TRUE | 33% |   | x | x |   |
| ADAMTSL5 | 19 | TRUE | 33% |   | x | x |   |
| MEX3D    | 19 | TRUE | 50% |   | x | x | x |
| MBD3     | 19 | TRUE | 50% |   | x | x | x |
| TCF3     | 19 | TRUE | 50% |   | x | x | x |
| ONECUT3  | 19 | TRUE | 67% | x | x | x | x |
| ATP8B3   | 19 | TRUE | 67% | x | x | x | x |
| REXO1    | 19 | TRUE | 67% | x | x | x | x |
| KLF16    | 19 | TRUE | 67% | x | x | x | x |
| SCAMP4   | 19 | TRUE | 67% | x | x | x | x |
| ADAT3    | 19 | TRUE | 67% | x | x | x | x |
| CSNK1G2  | 19 | TRUE | 67% | x | x | x | x |
| BTBD2    | 19 | TRUE | 67% | x | x | x | x |
| MKNK2    | 19 | TRUE | 67% | x | x | x | x |
| MOBKL2A  | 19 | TRUE | 67% | x | x | x | x |
| AP3D1    | 19 | TRUE | 67% | x | x | x | x |
| DOT1L    | 19 | TRUE | 67% | x | x | x | x |
| PLEKHJ1  | 19 | TRUE | 67% | x | x | x | x |
| SF3A2    | 19 | TRUE | 67% | x | x | x | x |
| AMH      | 19 | TRUE | 67% | x | x | x | x |
| JSRP1    | 19 | TRUE | 67% | x | x | x | x |
| OAZ1     | 19 | TRUE | 67% | x | x | x | x |

|         |    |       |     |   |   |   |   |
|---------|----|-------|-----|---|---|---|---|
| LINGO3  | 19 | TRUE  | 67% | x | x | x | x |
| LSM7    | 19 | TRUE  | 33% |   | x | x |   |
| TMPRSS9 | 19 | FALSE | 33% |   | x | x |   |
| TIMM13  | 19 | FALSE | 33% |   | x | x |   |
| LMNB2   | 19 | FALSE | 33% |   | x | x |   |
| GADD45B | 19 | FALSE | 17% |   | x |   |   |

**Legend.** x= deleted. Tumor Codes: A: 15259; B: 12353A; C: 12115B; D: 11929A; E: 16898; F: 2044B; G: 16892. Mmu = *Mus musculus*. Hs = *Homo sapiens*. Some of the deletions extend further than indicated. The True (deleted) and False (not deleted) calls for human gene deletions are from TCGA level 4 data (see Methods) and refer to whether that locus is deleted at levels statistically above background. Human genes in red are potentially cancer-relevant. Red shaded regions are the “critical regions” of a deletion set. The “Chaos3 CNA” column refers to the % of Chaos3 mammary tumors analyzed by aCGH that contained deletions of that particular locus.
