# Supplementary material
Source: PubMed Central journal article supplement (PMC3454871)
Supplement: 12b7ada78816629408d6355459c88aa4_genetics.112.142802-1.pdf [file 12b7ada78816629408d6355459c88aa4_genetics.112.142802-1.pdf]

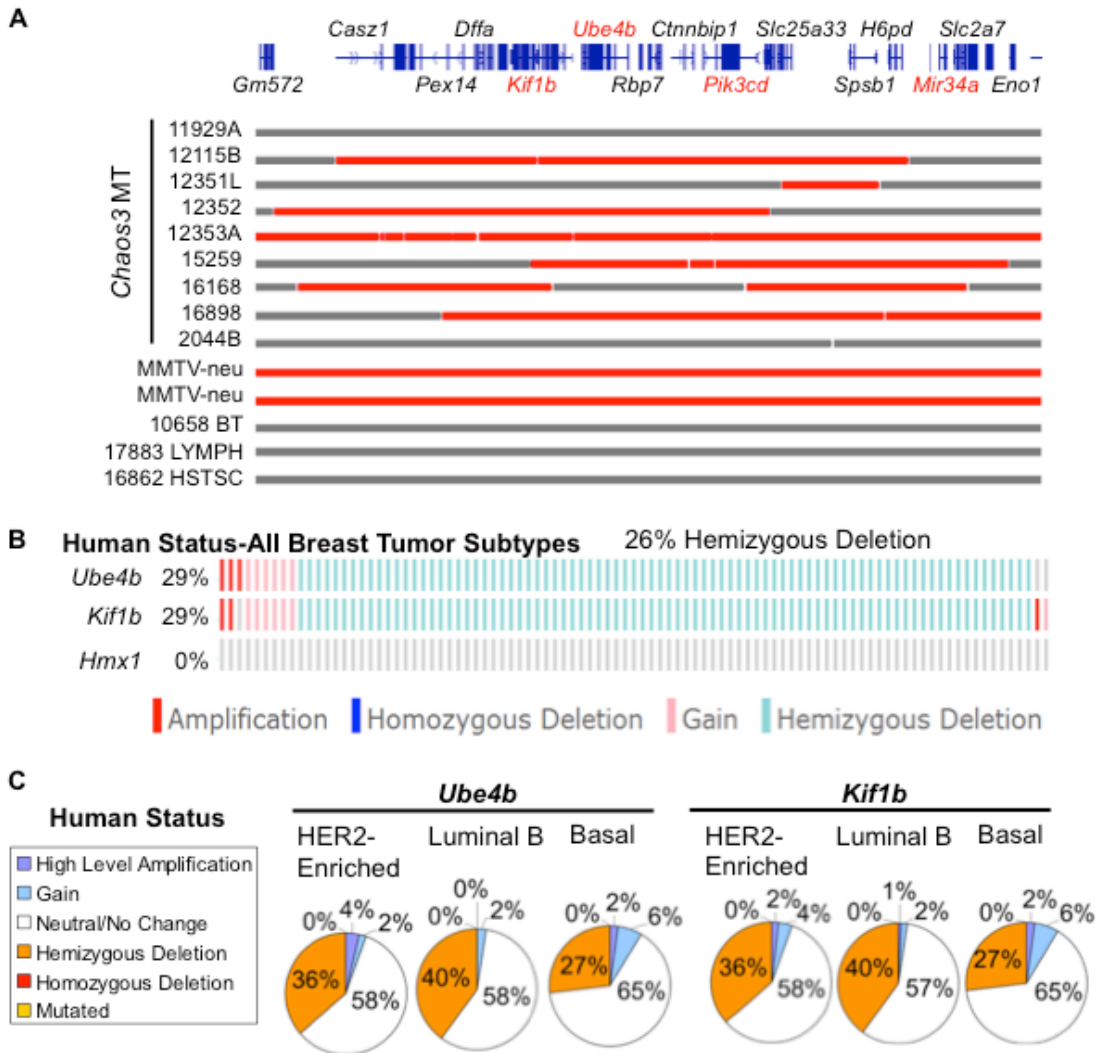

**Figure S3** *Ube4b* and *Kif1b*, deleted in over half of *Chaos3* mammary tumors, show frequent deletion in human breast tumors. (A) Recurrent Chr 4 deletions specific to mammary tumors (MT). Horizontal bars represent tumors examined by aCGH. Red portions of bars indicate deleted regions in *Chaos3* and MMTV-neu MTs. Cancer-related genes are in red. Note that *Chaos3* non-MTs do not demonstrate this deletion. BT=bone tumor; LYMPH = Lymphoma; HSTSC=histiocytic sarcoma. (B) “Oncoprints” of *Ube4b* and *Kif1b* alterations in 320 human breast tumors (TCGA data) generated by the cBio portal (see Methods). Rows contain bars representing individual tumors, and samples are aligned for visualization of alterations within the same tumor across multiple genes. *Hmx1* does not have a known role in cancer. (C) Percentage of *Ube4b* and *Kif1b* CNAs in 55 Her2-Enriched, 125 Luminal B, and 93 Basal human breast tumors (TCGA). Note that ~40% of HER2-Enriched and Luminal B tumors have hemizygous deletion of *Ube4b* and *Kif1b*, as do 27% of Basal-type breast tumors.
