# Supplementary material
Source: PubMed Central journal article supplement (PMC3454871)
Supplement: 14eb726e170d90b92fc58f2a82afe67b_genetics.112.142802-2.pdf [file 14eb726e170d90b92fc58f2a82afe67b_genetics.112.142802-2.pdf]

**Table S1 Validated Gene Mutations in *Chaos3* Mammary Tumors**

| Sample | Name  | Mutation | Effect      | Description                         | Function                                                                                                      |
|--------|-------|----------|-------------|-------------------------------------|---------------------------------------------------------------------------------------------------------------|
| 15259  | Myo1g | G/A      | Splice Site | Myosin-Ig                           | Precursor of minor histocompatibility antigen HA-2                                                            |
| 2042   | Acsf6 | G/T      | E>D         | Long-chain-fatty-acid--CoA ligase 6 | Catalyze formation of acyl-CoA from fatty acids, ATP, and CoA.                                                |
| 2042   | Tdrd6 | T/C      | H>R         | Tudor domain-containing protein 6   | Required for spermiogenesis, chromatoid body architecture, and regulation of miRNA expression.                |
| 2042   | Ttn   | C/T      | D>N         | Titin (Connectin)                   | Cardiac and skeletal muscle protein. Disease Associations: Familial Cardiomyopathy, Tibial muscular dystrophy |
| 2044b  | Ttn   | C/G      | V>L         | Titin (Connectin)                   |                                                                                                               |

Note: The mutations were validated by Sanger sequencing of PCR products.
