# Supplementary material
Source: PubMed Central journal article supplement (PMC3454871)
Supplement: 73d32b772cbbbc0bcab2304e02f6a229_genetics.112.142802-7.pdf [file 73d32b772cbbbc0bcab2304e02f6a229_genetics.112.142802-7.pdf]

Table S4 qPCR analysis of *Nf1* locus in tumors

| Geno & Type | Tumor #  | <i>Nf1</i> 5' | <i>Nf1</i> 3' ( <i>Omg</i> ) |
|-------------|----------|---------------|------------------------------|
| Chaos3 MT   | 15259    | 17.4          | 52.9                         |
| Chaos3 MT   | 12351 L  | 35.5          | 12.0                         |
| Chaos3 MT   | 12353A   | 25.5          | 16.7                         |
| Chaos3 MT   | 12352    | 12.7          | 0.7                          |
| Chaos3 MT   | 2044B CL | 63.7          | 48.0                         |
| Chaos3 MT   | 11929A   | 16.7          | 16.3                         |
| Chaos3 MT   | 16168    | 9.2           | ND                           |
| Chaos3 MT   | 16898    | 9.6           | 75.1                         |
| Chaos3 MT   | 12115B   | 31.2          | 38.7                         |
| Chaos3 MT   | 2042 CL  | 78.9          | 92.3                         |
| Chaos3 MT   | 919 CL   | 51.8          | 0.1                          |
| Chaos3 MT   | 21040    | 0.1           | 0.1                          |
| Chaos3 MT   | 21253    | 0.3           | 0.2                          |
| Chaos3 MT   | 20317    | 29.5          | 48.7                         |
| Chaos3 MT   | 19957    | 32.7          | 5.4                          |
| Chaos3 MT   | 19958    | 11.2          | 12.4                         |
| Chaos3 MT   | 19959    | 14.4          | 72.4                         |
| Chaos3 MT   | 20783    | 7.0           | 10.4                         |
| Chaos3 MT   | 20164    | 20.6          | 22.8                         |
| Chaos3 MT   | 20888    | 27.3          | 26.0                         |
| Chaos3 MT   | 20892    | 6.4           | 34.9                         |
| Chaos3 MT   | 20893    | 7.4           | 24.5                         |
| Chaos3 MT   | 20138    | 41.1          | 10.8                         |
| Chaos3 MT   | 21039    | 68.4          | 66.7                         |
| Chaos3 MT   | 21809    | 62.0          | 60.0                         |
| Chaos3 MT   | 20894    | 85.1          | 67.1                         |
| Chaos3 MT   | 20889    | 12.0          | 18.4                         |
| Chaos3 MT   | 21333    | 40.8          | 71.4                         |
| Chaos3 MT   | 20626    | 36.7          | 22.6                         |
| Chaos3 MT   | 20318    | 14.5          | 24.9                         |
| Chaos3 MT   | 20890    | 13.6          | 38.9                         |
| Chaos3 MT   | 20891    | 2.5           | 1.4                          |
| Chaos3 MT   | 21123    | 34.7          | 39.0                         |
| Chaos3 MT   | 19660    | 44.8          | 48.3                         |
| Chaos3 MT   | 20459    | 53.7          | 69.8                         |
| Chaos3 MT   | 21597    | 28.6          | 5.3                          |
| Chaos3 MT   | 22182    | 62.6          | 78.2                         |
| Chaos3 MT   | 21416    | 63.8          | 56.8                         |
| Chaos3 MT   | 22236    | 31.6          | 8.0                          |
| Chaos3 MT   | 22418    | 24.9          | 24.2                         |
| Chaos3 MT   | 22180    | 23.9          | 49.0                         |
| Chaos3 MT   | 22235    | 8.1           | 8.2                          |
| Chaos3 MT   | 22166    | 21.7          | 21.0                         |
| Chaos3 MT   | 22168    | 8.0           | 7.6                          |
| Chaos3 MT   | 22238    | 3.4           | 3.4                          |

|               |       |       |       |
|---------------|-------|-------|-------|
| Chaos3 MT     | 21417 | 3.3   | 14.8  |
| Chaos3 MT     | 21419 | 19.2  | 50.6  |
| Chaos3 MT     | 21255 | 7.0   | 6.1   |
| Chaos3 MT     | 21124 | 8.5   | 29.1  |
| Chaos3 MT     | 21810 | 26.3  | 27.0  |
| Chaos3 MT     | 21811 | 47.3  | 51.7  |
| Chaos3 MT     | 21254 | 9.5   | 7.9   |
| Chaos3 MT     | 21041 | 24.4  | 21.2  |
| Chaos3 MT     | 22420 | 40.5  | 17.1  |
| Chaos3 MT     | 22476 | 75.5  | 70.7  |
| Chaos3 MT     | 22414 | 3.3   | 17.1  |
| Chaos3 MT     | 22416 | 3.5   | 14.6  |
| Chaos3 MT     | 22417 | 7.1   | 19.4  |
| Chaos3 MT     | 23116 | 11.2  | 10.8  |
| Chaos3 MT     | 22418 | 115.0 | 110.3 |
| Chaos3 non-MT | 19160 | 198.2 | 207.5 |
| Chaos3 non-MT | 10658 | 87.1  | ND    |
| Chaos3 non-MT | 16862 | 98.5  | 101.2 |
| Chaos3 non-MT | 17883 | 97.0  | 88.0  |
| PyVT          |       | 96.3  | 105.1 |
| MMTV-neu1     |       | 108.6 | 93.2  |
| MMTV-neu2     |       | 103.8 | 104.4 |
| Chaos3 +/- MT |       | 107.3 | 109.4 |

**Legend.** qPCR values are presented as the percentage vs C3H DNA. *Nf1* probes were at the 5' and 3' ends of the gene. The 3' probe actually corresponds to the *Omg* gene that lies within an *Nf1* intron near the 3' end. Note that copy number differences between the *Nf1* 5' and 3' are observed in some tumors, indicating a breakpoint within *Nf1*. Deletion calls were made as follows: Heterozygous = 15-80%; Homozygous = <15%. If either *Nf1* or *Omg* were <15%, the tumor sample was called as homozygous deleted because full *Nf1* transcripts cannot be made. MT = mammary tumor.
