# Supplementary material
Source: PubMed Central journal article supplement (PMC3454871)
Supplement: bfd15b044c0321c00b10b004a4bcf34e_genetics.112.142802-4.pdf [file bfd15b044c0321c00b10b004a4bcf34e_genetics.112.142802-4.pdf]

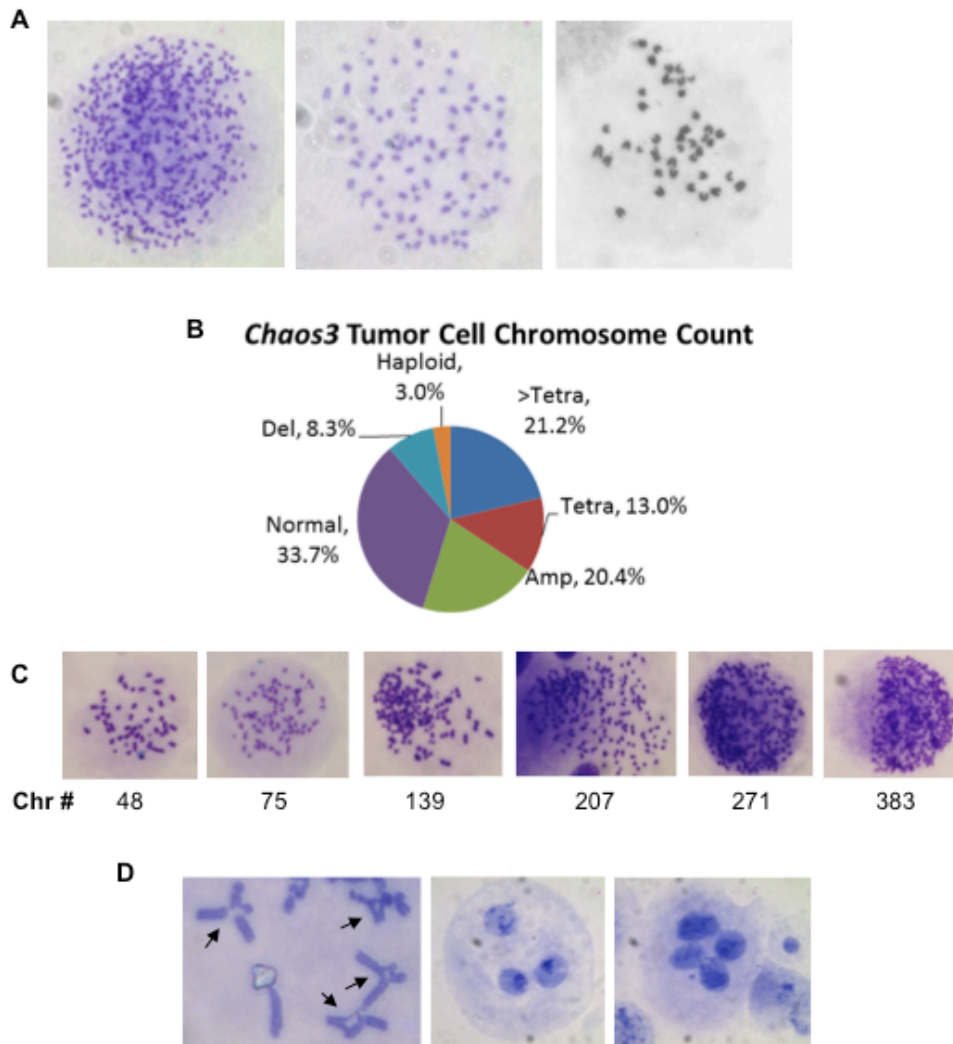

**Figure S1** *Chaos3* tumors demonstrate high levels of GIN and aneuploidy. (A) Metaphase spreads from cells of 3 *Chaos3* mammary tumors. Note aneuploidy in left and middle spreads compared to the normal 40 chromosomes (left to right: 414, 83, 40). (B) Examination of 16 *Chaos3* tumors reveal a normal chromosome count in an average of only 1/3 of the cells (>Tetra= Beyond Tetraploidy; Tetra=Tetraploid; Amp=Amplification; Del=Deletion). (C) Metaphase spreads from one *Chaos3* mammary tumor (16864a). Chromosome count is indicated beneath the images. Note the extreme variation of aneuploidy found within a single tumor. (D) Additional abnormal features displayed by tumor cells, including: cruciform structures (left) and abnormal multi-nucleated cells (middle and right).
