# Supplementary material
Source: PubMed Central journal article supplement (PMC3454871)
Supplement: fba7266ae3d8c50a6889f0ce72299a0b_genetics.112.142802-9.pdf [file fba7266ae3d8c50a6889f0ce72299a0b_genetics.112.142802-9.pdf]

Table S2 *Chaos3*-specific and Mammary Tumor-specific Recurrent Deletions Overlapping Human Breast Cancer CNAs.

| Mouse CNA                   | Gene     | Hum Chr | Human CNA | <i>Chaos3</i> CNA | Tumors |   |   |   |   |   |   |   |   |   |
|-----------------------------|----------|---------|-----------|-------------------|--------|---|---|---|---|---|---|---|---|---|
|                             |          |         |           |                   | A      | B | C | D | E | F | G | H | I |   |
| Mmu Chr 4<br>148.4-149.5 Mb | SLC2A7   | 1       | FALSE     | 33%               |        | x |   |   |   | x |   |   |   |   |
|                             | SLC2A5   | 1       | FALSE     | 50%               |        | x |   |   |   | x | x |   |   |   |
|                             | GPR157   | 1       | FALSE     | 50%               |        | x |   |   |   | x | x |   |   |   |
|                             | MIR34A   | 1       | FALSE     | 50%               |        | x |   |   |   | x | x |   |   |   |
|                             | H6PD     | 1       | FALSE     | 57%               |        | x |   |   |   | x | x | x |   |   |
|                             | SPSB1    | 1       | FALSE     | 86%               |        | x | x |   |   | x | x | x | x |   |
|                             | SLC25A33 | 1       | FALSE     | 86%               |        | x | x |   |   | x | x | x | x |   |
|                             | TMEM201  | 1       | FALSE     | 86%               |        | x | x |   |   | x | x | x | x |   |
|                             | PIK3CD   | 1       | FALSE     | 86%               |        | x |   |   | x | x | x | x | x |   |
|                             | CLSTN1   | 1       | FALSE     | 71%               |        | x |   |   | x | x |   | x | x |   |
|                             | CTNNBIP1 | 1       | FALSE     | 71%               |        | x |   |   | x | x |   | x | x |   |
|                             | LZIC     | 1       | FALSE     | 71%               |        | x |   |   | x | x |   | x | x |   |
|                             | NMNAT1   | 1       | FALSE     | 71%               |        | x |   |   | x | x |   | x | x |   |
|                             | RBP7     | 1       | FALSE     | 71%               |        | x |   |   | x | x |   | x | x |   |
|                             | UBE4B    | 1       | TRUE      | 71%               |        | x |   |   | x | x |   | x | x |   |
|                             | KIF1B    | 1       | TRUE      | 71%               |        | x |   |   | x | x |   | x | x |   |
|                             | PGD      | 1       | TRUE      | 33%               |        |   | x |   | x |   |   |   |   | x |
|                             | APITD1   | 1       | TRUE      | 33%               |        |   | x |   | x |   |   |   |   | x |
|                             | CORT     | 1       | TRUE      | 33%               |        |   | x |   | x |   |   |   |   | x |
|                             | DFFA     | 1       | TRUE      | 33%               |        |   | x |   | x |   |   |   |   | x |
|                             | PEX14    | 1       | TRUE      | 33%               |        |   | x |   | x |   |   |   |   | x |
|                             | CASZ1    | 1       | TRUE      | 33%               |        |   | x |   | x |   |   |   |   |   |
|                             | TARDBP   | 1       | FALSE     | 17%               |        |   | x |   |   |   |   |   |   |   |
| MASP2                       | 1        | FALSE   | 17%       |                   |        | x |   |   |   |   |   |   |   |   |
| SRM                         | 1        | FALSE   | 17%       |                   |        | x |   |   |   |   |   |   |   |   |
| Mmu Chr 5<br>122-125 Mb     | CLIP1    | 12      | FALSE     | 43%               | x      | x |   |   |   |   |   |   | x |   |
|                             | ZCCHC8   | 12      | FALSE     | 43%               | x      | x |   |   |   |   |   |   | x |   |
|                             | RSRC2    | 12      | FALSE     | 43%               | x      | x |   |   |   |   |   |   | x |   |
|                             | KNTC1    | 12      | FALSE     | 71%               | x      | x |   | x |   |   |   | x |   | x |
|                             | GPR81    | 12      | FALSE     | 71%               | x      | x |   | x |   |   |   | x |   | x |
|                             | DENR     | 12      | FALSE     | 71%               | x      | x |   | x |   |   |   | x |   | x |
|                             | CCDC62   | 12      | FALSE     | 71%               | x      | x |   | x |   |   |   | x |   | x |
|                             | HIP1R    | 12      | FALSE     | 71%               | x      | x |   | x |   |   |   | x |   | x |
|                             | VPS37B   | 12      | FALSE     | 86%               | x      | x | x | x |   |   |   | x |   | x |
|                             | ABCB9    | 12      | FALSE     | 86%               | x      | x | x | x |   |   |   | x |   | x |
|                             | OGFOD2   | 12      | FALSE     | 86%               | x      | x | x | x |   |   |   | x |   | x |
|                             | ARL6IP4  | 12      | FALSE     | 86%               | x      | x | x | x |   |   |   | x |   | x |
|                             | PITPNM2  | 12      | FALSE     | 86%               | x      | x | x | x |   |   |   | x |   | x |
|                             | MPHOSPH9 | 12      | FALSE     | 86%               | x      | x | x | x |   |   |   | x |   | x |
|                             | CDK2AP1  | 12      | FALSE     | 86%               | x      | x | x | x |   |   |   | x |   | x |
| SBNO1                       | 12       | FALSE   | 86%       | x                 | x      | x | x |   |   |   | x |   | x |   |

|                                 |           |     |       |      |      |   |   |    |    |    |    |   |    |
|---------------------------------|-----------|-----|-------|------|------|---|---|----|----|----|----|---|----|
|                                 | SETD8     | 12  | FALSE | 86%  | x    | x | x | x  |    | x  | x  |   |    |
|                                 | RILPL2    | 12  | FALSE | 86%  | x    | x | x | x  |    | x  | x  |   |    |
|                                 | SNRNP35   | 12  | FALSE | 100% | x    | x | x | x  |    | x  | x  |   |    |
|                                 | RILPL1    | 12  | FALSE | 100% | x    | x | x | x  |    | x  | x  |   |    |
|                                 | TMED2     | 12  | FALSE | 100% | x    | x | x | x  |    | x  | x  |   |    |
|                                 | DDX55     | 12  | FALSE | 100% | x    | x | x | x  |    | x  | x  |   |    |
|                                 | EIF2B1    | 12  | FALSE | 100% | x    | x | x | x  |    | x  | x  |   |    |
|                                 | GTF2H3    | 12  | FALSE | 100% | x    | x | x | x  |    | x  | x  |   |    |
|                                 | TCTN2     | 12  | FALSE | 100% | x    | x | x | x  |    | x  | x  |   |    |
|                                 | ATP6V0A2  | 12  | FALSE | 43%  |      |   |   |    | x  |    | x  |   |    |
|                                 | CCDC92    | 12  | FALSE | 29%  |      |   |   |    |    | x  | x  |   |    |
|                                 | Zfp664    | 12  | FALSE | 14%  |      |   |   |    |    | x  |    |   |    |
|                                 | Fam101a   | 12  | TRUE  | 14%  |      |   |   |    |    | x  |    |   |    |
|                                 | Ncor2     | 12  | TRUE  | 14%  |      |   |   |    |    | x  |    |   |    |
|                                 | Scarb1    | 12  | FALSE | 14%  |      |   |   |    |    | x  |    |   |    |
| <b>Mmu Chr 11</b><br>78-79.6 Mb | WSB1      | 17  | FALSE | 100% | x    | x | x | *  | x  | *  | x  | x | x* |
|                                 | KSR1      | 17  | TRUE  | 100% | x    | x | x | *  | x  | *  | x  | x | x* |
|                                 | LGALS9    | 17  | TRUE  | 57%  |      | x |   | x* |    | x* |    | x | x* |
|                                 | NOS2      | 17  | TRUE  | 57%  |      | x |   | x* |    | *  |    | x |    |
|                                 | NLK       | 17  | FALSE | 43%  |      | x |   |    |    | x* |    | x |    |
|                                 | TMEM97    | 17  | FALSE | 29%  |      | x |   |    |    | *  |    | x |    |
|                                 | IFT20     | 17  | FALSE | 29%  |      | x |   |    |    | *  |    | x |    |
|                                 | TNFAIP1   | 17  | FALSE | 29%  |      | x |   |    |    | x* |    | x |    |
|                                 | POLDIP2   | 17  | FALSE | 29%  |      | x |   |    |    |    |    | x |    |
|                                 | TMEM199   | 17  | FALSE | 29%  |      | x |   |    |    |    |    | x |    |
|                                 | SEBOX     | 17  | FALSE | 29%  |      | x |   |    |    |    |    | x |    |
|                                 | VTN       | 17  | FALSE | 29%  |      | x |   |    |    |    |    | x |    |
|                                 | SARM1     | 17  | FALSE | 29%  |      | x |   |    |    |    |    | x |    |
|                                 | SLC46A1   | 17  | FALSE | 29%  |      | x |   |    |    |    |    | x |    |
|                                 | SLC13A2   | 17  | FALSE | 29%  |      | x |   |    |    |    |    | x |    |
|                                 | FOXN1     | 17  | FALSE | 29%  |      | x |   |    |    |    |    | x |    |
|                                 | UNC119    | 17  | FALSE | 17%  |      | x |   |    |    |    |    |   |    |
|                                 | PIGS      | 17  | FALSE | 17%  |      | x |   |    |    |    |    |   |    |
|                                 | ALDOC     | 17  | FALSE | 17%  |      | x |   |    |    |    |    |   |    |
|                                 |           | NF1 | 17    | TRUE | 100% | x | x | x  | x* | x  | x* | x | x  |
|                                 | OMG       | 17  | TRUE  | 86%  | x    | x | x | x* | x  |    | x  |   | x  |
|                                 | EVI2B     | 17  | TRUE  | 86%  | x    | x | x | *  | x  |    | x  |   | x  |
|                                 | EVI2A     | 17  | TRUE  | 71%  | x    | x | x | *  | x  |    | x  |   |    |
|                                 | RAB11FIP4 | 17  | TRUE  | 57%  | x    | x | x | x* | x  |    |    |   |    |

**Legend.** x= deleted as determined by aCGH analysis. Some qPCR genotyping from the Chr 11 interval was added, and deleted probes are indicated as x\*. Presumed deleted probes are indicated by "\*". Tumor Codes: A: 2044B; B: 12353A; C: 12351L; D: 12352; E: 15259; F: 16168; G: 12115B; H: 16898; I: 11929A. Mmu = *Mus musculus*. Some of the deletions extend further than indicated. The True (deleted) and False (not deleted) calls for human gene deletions are from TCGA level 4 data (see Methods) and refer to whether that locus is deleted at levels statistically above background. Human genes in red are potentially cancer-relevant if deleted. Red shaded regions are the "critical regions" of a deletion set. Note that the Mmu Chr 11 deletion cluster is organized in the human genome order, which is inverted and has an insertion. Thus, the critical region is actually contiguous. The "Chaos3 CNA" column refers to the % of Chaos3 mammary tumors analyzed by aCGH that contained deletions of that particular locus. ND=no data.
